# Supplementary material for: Abomasitis in calves: A retrospective cohort study of 23 cases (2006‐2016)
Source: PubMed Central journal article supplement (PMC7096666; doi:10.1111/jvim.15726), 2020-02-14
Supplement: JVIM-34-1018-s001.pdf [file JVIM-34-1018-s001.pdf]

|                              | <b>Item No</b> | <b>Recommendation</b>                                                                                                                                                                                                                                                      | <b>Page No</b> |
|------------------------------|----------------|----------------------------------------------------------------------------------------------------------------------------------------------------------------------------------------------------------------------------------------------------------------------------|----------------|
| <b>Title and abstract</b>    | 1              | (a) Indicate the study's design with a commonly used term in the title or the abstract                                                                                                                                                                                     | 1              |
|                              |                | (b) Provide in the abstract an informative and balanced summary of what was done and what was found: why the study was conducted, the design, the results, the limitations, and the relevance of the findings.                                                             | 4              |
| <b>Introduction</b>          |                |                                                                                                                                                                                                                                                                            |                |
| Background/rationale         | 2              | Explain the scientific background and rationale for the investigation being reported                                                                                                                                                                                       | 6              |
| Objectives                   | 3              | (a) State specific objectives, including any prespecified hypotheses                                                                                                                                                                                                       | 7              |
|                              |                | (b) Ensure that the level of organization is clear for each objective and hypothesis                                                                                                                                                                                       | 7              |
| <b>Methods</b>               |                |                                                                                                                                                                                                                                                                            |                |
| Study design                 | 4              | Present key elements of study design early in the paper                                                                                                                                                                                                                    | 8              |
| Setting                      | 5              | (a) Describe the setting, locations, and relevant dates, including periods of recruitment, exposure, follow-up, and data collection                                                                                                                                        | 8              |
|                              |                | (b) If applicable, include information at each level of organization.                                                                                                                                                                                                      | -              |
| Participants                 | 6              | (a) Give the eligibility criteria, and the sources and methods of selection of participants. Describe methods of follow-up                                                                                                                                                 | 8              |
|                              |                | (b) For matched studies, give matching criteria and number of exposed and unexposed                                                                                                                                                                                        | -              |
| Variables                    | 7              | (a) Clearly define all outcomes, exposures, predictors, potential confounders, and effect modifiers. Give diagnostic criteria, if applicable                                                                                                                               | 8              |
|                              |                | (b) Describe the level of organization at which each variable was measured                                                                                                                                                                                                 | 8-10           |
|                              |                | (c) For hypothesis-driven studies, the putative causal structure among variables should be described                                                                                                                                                                       | -              |
| Data sources/<br>measurement | 8*             | (a) For each variable of interest, give sources of data and details of methods of assessment (measurement). Describe comparability of assessment methods if there is more than one group<br><br>(b) If a questionnaire was used to collect data, describe its development, | 8-10           |

| <b>Item No</b>         | <b>Recommendation</b>                                                                                                                                                                                | <b>Page No</b> |
|------------------------|------------------------------------------------------------------------------------------------------------------------------------------------------------------------------------------------------|----------------|
|                        | validation, and administration                                                                                                                                                                       | 9              |
|                        | (c) Describe whether or not individuals involved in data collection were blinded, when applicable                                                                                                    | -              |
|                        | (d) Describe any efforts to assess the accuracy of the data (including methods used for “data cleaning” in primary research, or methods used for validating secondary data)                          | -              |
| Bias                   | 9 Describe any efforts to address potential sources of bias                                                                                                                                          | 17-18          |
| Study size             | 10 (a) Describe how the study size was arrived at for each relevant level of organization                                                                                                            | 8 & 11         |
|                        | (b) Describe how nonindependence of measurements was incorporated into sample-size considerations, if applicable                                                                                     | -              |
|                        | (c) If a formal sample-size calculation was used, describe the parameters, assumptions, and methods that were used, including a justification for the effect size selected                           | -              |
| Quantitative variables | 11 Explain how quantitative variables were handled in the analyses. If applicable, describe which groupings were chosen and why                                                                      | 7-8            |
| Statistical methods    | 12 (a) Describe all statistical methods, including those used to control for confounding                                                                                                             | 9-10 & 17-18   |
|                        | (b) Describe any methods used to examine subgroups and interactions                                                                                                                                  | -              |
|                        | (c) Explain how missing data were addressed                                                                                                                                                          | 10             |
|                        | (d) If applicable, describe the analytical approach to loss to follow-up, matching, complex sampling, and multiplicity of analyses                                                                   | 9-10           |
|                        | (e) Describe any methods used to assess the robustness of the analyses                                                                                                                               | -              |
| <b>Results</b>         |                                                                                                                                                                                                      |                |
| Participants           | 13 (a) Report numbers of individuals at each stage of study—eg numbers potentially eligible, examined for eligibility, confirmed eligible, included in the study, completing follow-up, and analysed | 11             |
|                        | (b) Give reasons for non-participation at each stage                                                                                                                                                 | -              |
|                        | (c) Consider use of a flow diagram                                                                                                                                                                   | Supp2          |
| Descriptive data       | 14 (a) Give characteristics of study participants (eg demographic, clinical,                                                                                                                         | 11             |

|                          | <b>Item No</b> | <b>Recommendation</b>                                                                                                                                                                                        | <b>Page No</b>   |
|--------------------------|----------------|--------------------------------------------------------------------------------------------------------------------------------------------------------------------------------------------------------------|------------------|
|                          |                | social) and information on exposures and potential confounders                                                                                                                                               |                  |
|                          |                | (b) Indicate number of participants with missing data for each variable of interest                                                                                                                          | 11-15            |
|                          |                | (c) Summarise follow-up time (eg, average and total amount)                                                                                                                                                  | 15               |
| Outcome data             | 15             | (a) Report outcomes as appropriate for the study design and summarize at all relevant levels of organization                                                                                                 | 14-15            |
|                          |                | (b) For proportions and rates, report the numerator and denominator                                                                                                                                          | 15               |
|                          |                | (c) For continuous outcomes, report the number of observations and a measure of variability                                                                                                                  | -                |
| Main results             | 16             | (a) Give unadjusted estimates and, if applicable, confounder-adjusted estimates and their precision (eg, 95% confidence interval). Make clear which confounders were adjusted for and why they were included | 11-15 &<br>17-18 |
|                          |                | (b) Report category boundaries when continuous variables were categorized                                                                                                                                    | -                |
|                          |                | (c) If relevant, consider translating estimates of relative risk into absolute risk for a meaningful time period                                                                                             | -                |
| Other analyses           | 17             | Report other analyses done—eg analyses of subgroups and interactions, and sensitivity analyses                                                                                                               | 15               |
| <b>Discussion</b>        |                |                                                                                                                                                                                                              |                  |
| Key results              | 18             | Summarise key results with reference to study objectives                                                                                                                                                     | 16-17            |
| Limitations              | 19             | Discuss limitations of the study, taking into account sources of potential bias or imprecision. Discuss both direction and magnitude of any potential bias                                                   | 17-18            |
| Interpretation           | 20             | Give a cautious overall interpretation of results considering objectives, limitations, multiplicity of analyses, results from similar studies, and other relevant evidence                                   | 16-18            |
| Generalisability         | 21             | Discuss the generalisability (external validity) of the study results                                                                                                                                        | 17-18            |
| <b>Other information</b> |                |                                                                                                                                                                                                              |                  |
| Transparency             | 22             | (a) Funding—Give the source of funding and the role of the funders for the present study and, if applicable, for the original study on which the present article is based                                    | 1                |
|                          |                | (b) Conflicts of interest—Describe any conflicts of interest, or lack thereof,                                                                                                                               | 1                |

| Item No | Recommendation                                                                                      | Page No |
|---------|-----------------------------------------------------------------------------------------------------|---------|
|         | for each author                                                                                     |         |
|         | (c) Describe the authors' roles—Provision of an author's declaration of transparency is recommended | 1       |
|         | (d) Ethical approval—Include information on ethical approval for use of animal and human subjects   | 1       |
|         | (e) Quality standards—Describe any quality standards used in the conduct of the research            | 1       |

**Supporting Information 1: STROBE Vet-Statement—Checklist (20-21)**
