# Supplementary material for: Abomasitis in calves: A retrospective cohort study of 23 cases (2006‐2016)
Source: PubMed Central journal article supplement (PMC7096666; doi:10.1111/jvim.15726), 2020-02-14
Supplement: JVIM-34-1018-s002.pdf [file JVIM-34-1018-s002.pdf]

Screening

Eligibility

Inclusion

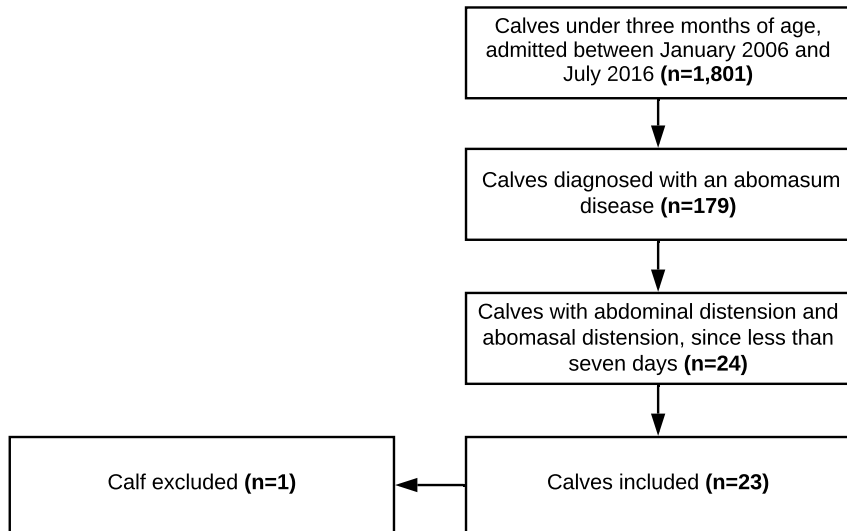

**Supporting information 2:** Flow diagram
